# Benchmarking miniaturized microscopy against two-photon calcium imaging using single-cell orientation tuning in mouse visual cortex

Annet Glas<sup>1,2</sup>, Mark Hübener<sup>1</sup>, Tobias Bonhoeffer<sup>1</sup>, Pieter M. Goltstein<sup>1\*</sup>

**1** Max Planck Institute of Neurobiology, Martinsried, Germany

**2** Graduate School of Systemic Neurosciences, Martinsried, Germany

\* goltstein@neuro.mpg.de

## Abstract

Miniaturized microscopes are lightweight imaging devices that allow optical recordings from neurons in freely moving animals over the course of weeks. Despite their ubiquitous use, individual neuronal responses measured with these microscopes have not been directly compared to those obtained with established *in vivo* imaging techniques such as bench-top two-photon microscopes. To achieve this, we performed calcium imaging in mouse primary visual cortex while presenting animals with drifting gratings. We identified the same neurons in image stacks acquired with both microscopy methods and quantified orientation tuning of individual neurons. The response amplitude and signal-to-noise ratio of calcium transients recorded upon visual stimulation were highly correlated between both microscopy methods, although influenced by neuropil contamination in miniaturized microscopy. Tuning properties, calculated for individual orientation tuned neurons, were strongly correlated between imaging techniques. Thus, neuronal tuning features measured with a miniaturized microscope are quantitatively similar to those obtained with a two-photon microscope.

## <sup>1</sup> Introduction

<sup>2</sup> In recent years, the arsenal of imaging techniques for neuroscience has been supplemented with  
<sup>3</sup> miniaturized microscopes, of which several versions are currently available [1–3]. Miniaturized  
<sup>4</sup> microscopes allow simultaneous, functional imaging of hundreds of neurons in a variety of brain

5 areas in freely moving animals as small as a mouse over extended periods of time [2, 4, 6]. Key  
6 merits of miniaturized microscopes as compared to benchtop microscopes are the ability for head-  
7 mounting and their low cost [1]. These qualities make miniaturized fluorescence microscopy a valuable  
8 complementary method to other *in vivo* imaging techniques [2]. A trade-off compared to two-photon  
9 microscopes is the lack of optical sectioning, resulting in poorer lateral and axial resolution due to  
10 out-of-focus fluorescence. In addition, conventional miniaturized microscopes have a reduced ability  
11 for imaging deeper in the tissue, which is inherent to single-photon versus two-photon illumination  
12 wavelengths [5]. Together, these factors prevent *in vivo* imaging of sub-cellular structures such as  
13 dendritic spines as of yet [2]. On the positive side, miniaturized microscopy does enable chronic  
14 imaging of neurons and circuits in behavioral paradigms that require minimally constrained movement  
15 of the animal, and it has even been used as an alternative to functional two-photon imaging in  
16 head-fixed paradigms [7].

17 Despite the increasing use of miniaturized microscopy, signal amplitudes and neuronal tuning  
18 properties obtained with miniaturized microscope imaging have not been directly compared to  
19 those assessed with established *in vivo* imaging methods. Receptive field properties of neurons in  
20 primary visual cortex (V1) provide a suitable model for a direct comparison between both methods.  
21 Responses of visual cortex neurons to drifting gratings of particular orientations have been extensively  
22 investigated (e.g. [8,9]). Individual neurons respond selectively to gratings of particular orientations  
23 and their preferred orientation remains largely stable across longer periods of time [9–12]. Here,  
24 we perform *in vivo* miniaturized and two-photon microscopy of neurons in V1 of anesthetized mice  
25 presented with moving gratings. We identify the same neurons with both microscopy techniques,  
26 and quantify the similarity in response properties of matched neurons.

## 27 **Materials and methods**

### 28 **Animals**

29 All procedures were performed in accordance with the institutional guidelines of the Max Planck  
30 Society and the local government (Regierung von Oberbayern, Germany). Eight female C57BL/6J  
31 mice (~P60 on day of surgery) were individually housed in ventilated cages and kept on an inverted  
32 12-h light, 12-h dark cycle with lights on at 10 AM. Ambient temperature (~22°C) and humidity  
33 (~55%) were kept constant. Water and standard chow were available ad libitum.

## 34 Surgery

35 Mice were anesthetized with a mixture of fentanyl, midazolam, and medetomidine (FMM; 0.05 mg  
36  $\text{kg}^{-1}$ , 5 mg  $\text{kg}^{-1}$ , and 0.5 mg  $\text{kg}^{-1}$  respectively, injected i.p.) and depth of anesthesia was monitored  
37 throughout the procedure by observation of the breathing rate and absence of a pedal reflex. Mice  
38 were placed in a stereotaxic apparatus (Neurostar) equipped with a thermal blanket (Harvard  
39 Apparatus). Eyes were covered with a thin layer of ophthalmic ointment. Lidocaine (0.2 mg  $\text{ml}^{-1}$  was  
40 sprayed onto the scalp for topical analgesia and carprofen (5 mg  $\text{kg}^{-1}$ , injected s.c.) was administered  
41 for analgesia. The skull was exposed, dried and scraped with a scalpel. A custom-designed aluminum  
42 head bar was positioned using cyanoacrylate glue and subsequently covered with dental acrylic  
43 (Paladur). The location of V1 was verified using intrinsic signal imaging [22, 23] and a 4 mm circular  
44 craniotomy was created centered over V1. To sparsely label a population of V1 excitatory neurons,  
45 mice were injected with a viral vector mixture consisting of AAV2/1 CamKII0.4-Cre ( $1.15 \cdot 10^{10}$  GC  
46  $\text{ml}^{-1}$ , Penn Vector Core) and AAV2/1 hSyn-flex-GCaMP6s ( $7.26 \cdot 10^{12}$  GC  $\text{ml}^{-1}$ , Penn Vector Core).  
47 At each injection site, 125 nl of viral vector was injected using a beveled glass pipette (30  $\mu\text{m}$  outer  
48 diameter) at an injection speed of 25 nl  $\text{min}^{-1}$ . The glass pipette was slowly retracted 10 min after  
49 initial placement. Upon injection, the craniotomy was covered with a circular cover glass (4 mm,  
50 Warner Instruments), which was glued in place using cyanoacrylate gel and subsequently cemented  
51 with dental acrylic. After surgery, mice were injected with a mixture of antagonists (naloxone,  
52 flumazenil, and atipamezole; 1.2 mg  $\text{kg}^{-1}$ , 0.5 mg  $\text{kg}^{-1}$ , and 2.5 mg  $\text{kg}^{-1}$  respectively, injected s.c.)  
53 and left to recover under a heat lamp. Carprofen (5 mg  $\text{kg}^{-1}$ , injected s.c.) was given on the three  
54 following days. Imaging experiments were conducted at least two weeks after surgery.

## 55 Visual stimulation

56 Visual stimuli were displayed on a single LCD monitor (Dell P2717H; resolution:  $1920 \times 1080$  pixels,  
57 width 60 cm, height 34 cm), with the center placed at roughly  $45^\circ$  azimuth and 12 cm from the  
58 animal's eye. To assess orientation tuning, we presented full-screen square wave gratings (8 directions,  
59  $45^\circ$  spacing) with a spatial frequency of 0.04 cycles per degree and a temporal frequency of 1.5 Hz.  
60 The stimulus set was flanked with a 30 s pre- and post-stimulation period. Each trial consisted of 3 s  
61 of moving grating, followed by 5 s of inter-trial interval during which a gray screen was presented.  
62 During both miniaturized and two-photon microscopy imaging sessions, the complete stimulus set was  
63 repeated five times, with a random order of directions in each repetition (trial). To avoid stimulus

64 light leak during two-photon imaging, monitor illumination was shuttered during each scan-line and  
65 only turned on during the line-scanner turnaround period [24]. The space between the microscopy  
66 objective and cranial window was closed off using opaque tape.

## 67 **Miniaturized microscopy**

68 Images were acquired with a commercially available miniaturized microscope (Basic Fluorescence  
69 Microscopy System - Surface, Doric Lenses) at a frame rate of 20 Hz and a resolution of  $630 \times 630$   
70 pixels (field of view  $1 \times 1$  mm). Laser power under the objective lens ( $2\times$  magnification, 0.5 NA)  
71 was  $<1$  mW for all imaging experiments. The excitation wavelength was 458 nm. To minimize  
72 movement, the miniaturized microscope was mounted on a rigid holder (Doric Lenses) attached to  
73 an XYZ translation stage (Luigs Neumann).

74 For miniaturized microscope imaging experiments, mice were anesthetized with FMM (0.04 mg  
75  $\text{kg}^{-1}$ , 4 mg  $\text{kg}^{-1}$ , and 0.4 mg  $\text{kg}^{-1}$  respectively, injected i.p.) The miniaturized microscope was  
76 positioned above the cranial window and lowered until the cortical surface blood vessel pattern  
77 became visible. To facilitate identification of individual neurons across microscopy techniques, a  
78 3-dimensional volume spanning a depth  $250 \mu\text{m}$  was acquired at  $5 \mu\text{m}$  intervals between imaging  
79 planes while no visual stimulus was presented. Subsequently, visual stimuli (see above) were presented  
80 during imaging. Per session, up to 10 imaging planes were recorded in layer 2/3 at  $10 \mu\text{m}$  depth  
81 intervals. The onset of imaging was approximately 60 minutes after the administration of anesthesia,  
82 and the total duration of recording was typically under 75 minutes.

## 83 **Two-photon microscopy**

84 Two-photon imaging was performed on a custom-built two-photon laser-scanning microscope with a  
85 Mai Tai eHP Ti:Sapphire laser (Spectra-Physics) set to a wavelength of 910 nm and a Nikon water  
86 immersion objective ( $16\times$  magnification, 0.8 NA). Images were acquired with an image resolution of  
87  $750 \times 800$  pixels at a frame rate of 10 Hz. The field of view for functional imaging was  $300 \times 320$   
88  $\mu\text{m}$ . Laser power under the objective was kept stable at 25 mW throughout the experiment. Imaging  
89 data were acquired using custom software written in LabVIEW (National Instruments).

90 Two-photon imaging experiments were conducted one week after the miniaturized microscope  
91 imaging session in one half of the animals ( $n = 4$  mice) and one week before the miniaturized  
92 microscope imaging session in the other half ( $n = 4$  mice). Mice were anesthetized with FMM

93 (0.04 mg kg<sup>-1</sup>, 4 mg kg<sup>-1</sup> and 0.4 mg kg<sup>-1</sup> respectively, injected i.p.). The imaging location of the  
94 previous miniaturized microscopy session was determined by comparing the blood-vessel pattern  
95 using a wide-field camera that was aligned with the two-photon microscope (Teledyne DALSA Inc.).  
96 Subsequently, the matched field of view was imaged with the two-photon microscope. Prior to  
97 functional imaging, a volume of 300 × 320 × 200 μm (XYZ) was imaged at 1 μm intervals while no  
98 visual stimulus was presented. For functional imaging, the anesthetized animal was presented with  
99 visual stimuli (see above), repeated for up to six imaging planes with depth increments of 10 μm.

## 100 Immunohistochemistry

101 Mice were deeply anesthetized and transcardially perfused with 9.25% w/v sucrose in distilled water  
102 followed by 4% PFA in PBS. Brains were then dissected out and post-fixed in 4% PFA for one week  
103 at 4°C. Coronal sections (50 μm) were cut on a microtome (Thermo Fisher Scientific) and were  
104 kept free-floating at 4°C until further processing. Immunohistochemistry was carried out using the  
105 primary antibodies chicken anti-GFP (1:1000; Millipore) labeling GCaMP6s and rabbit anti-Homer3  
106 (1:250; Synaptic Systems), which labels excitatory neurons. After washing, sections were incubated  
107 with species-specific secondary antibodies conjugated to Alexa Fluor 488 (1:200; Life Technologies) or  
108 Cy3 (1:200; Life Technologies) and mounted with mounting medium containing DAPI (Vectashield).

109 Images were acquired using a laser-scanning confocal microscope (Leica, TCS SP8), across serial  
110 optical sections (spaced at 1 μm) acquired with a 20× objective (NA 0.75) at a resolution of 1024  
111 × 1024 with a sequential scan using excitation lasers for DAPI (405 nm), Alexa488 (488 nm) and  
112 Cy3 (561 nm). Quantitative analysis was performed with the “Cell Counter” plug-in for ImageJ, by  
113 counting GFP expressing cells among Homer 3 expressing cells in cortical layer 2/3 (100-300 μm  
114 from the pial surface).

## 115 Analysis

116 Analysis of imaging data was performed using custom written routines in Matlab R2016b (Mathworks)  
117 and manual routines in the Fiji package of ImageJ (US National Institutes of Health) [25]. Small  
118 in-plane movement artefacts were corrected by aligning the images to a template [26]. Next, to  
119 identify the same neurons imaged with both microscopes, images obtained with both microscopes  
120 were scaled to match pixel size and image orientation. Initial alignments were made based on the cell  
121 location relative to major landmarks such as blood vessels. Once two pairs of neurons were judged to

122 be identical in both imaging planes, the images were aligned using an ImageJ plugin (Align Image by  
123 line ROI). Subsequently, other cell pairs were identified based on absolute distance relative to other  
124 cells and blood vessels.

125 Cellular fluorescence signals were calculated for each imaging frame by averaging across all pixels  
126 within manually drawn regions of interest (ROIs). Fluorescence signals from miniaturized microscope  
127 recordings were corrected for local neuropil contamination by subtracting the average fluorescence in  
128 a 27  $\mu\text{m}$  ring (using a neuropil correction factor of 1.0) [13]. Because of the sparse labelling with  
129 GCaMP6, neuropil subtraction was not necessary for data acquired with the two-photon microscope  
130 (see also Results and Fig. 2e). In addition, for a small subset of data constrained non-negative matrix  
131 factorization for endoscopic data (CNMF-E) [14] was applied to miniaturized microscopy imaging  
132 frames, using a Gaussian kernel width 3.17  $\mu\text{m}$ , maximum soma diameter 23.8  $\mu\text{m}$ , minimum local  
133 correlation 0.8, minimum peak-to-noise ratio 6, spatial overlap ratio 0.05 and temporal correlation  
134 0.8. For comparison of calcium transients, we determined putative sources to be identical between the  
135 methods when the CNMF-E-detected seed pixel and manually detected center pixel were less than  
136 10  $\mu\text{m}$  apart, and if we could visually confirm similarity of the detected ROI contours. Next,  $\Delta F/F$   
137 calcium signals were quantified as relative increase in fluorescence over baseline, which was derived  
138 from the mean lowest 50% values in a 60 s sliding window [27]. In order to compare signal and  
139 noise amplitudes, miniaturized microscope data were resampled to the frame rate of the two-photon  
140 microscope (10 Hz). For each neuron, the signal amplitude was determined as the largest mean  
141 (across trials) response to any of the eight visual stimuli. Noise amplitude was calculated as the  
142 standard deviation of the  $\Delta F/F$  values in the two-second period before stimulus presentation.

143 A neuron was defined as orientation tuned if it matched two criteria. First, the response to  
144 any of the eight movement directions was significantly different from any of the other directions  
145 ( $p < 0.01$ ), tested using the non-parametric Kruskal-Wallis test. Second, we excluded neurons of which  
146 the response to the preferred direction did not exceed the median response amplitude of the entire  
147 population of neurons (miniature microscope: 0.115  $\Delta F/F$ ; two-photon microscope: 0.0525  $\Delta F/F$ ;  
148 see Results and Fig. 3b). Orientation tuning curves were constructed by averaging the response to  
149 each movement direction and fitted with a two peaked Gaussian curve [28]. Preferred orientation  
150 was defined as the maximum of the fitted curve, and the tuning curve bandwidth was defined as  
151 half width of the fitted curve at  $1/\sqrt{2}$  maximum. To quantify global orientation selectivity, we  
152 determined the normalized length of the mean response vector (also referred to as 1-circular variance  
153 or 1-CV) [29].

## 154 **Statistics**

155 Normality of distributions was verified using the Kolmogorov-Smirnov test. Similarity of two different  
156 distributions was analyzed with the two-sample Kolmogorov-Smirnov test. A Mann-Whitney U  
157 test was used to compare distribution medians (Mdn). The tuning features circular variance and  
158 bandwidth of individual neurons were compared by computing the Spearman correlation coefficient  
159  $r_s$  between both microscopy techniques and the preferred orientation was compared using the circular  
160 correlation coefficient  $r_{\text{circ}}$  (The orientation space was remapped to the range of 0 to  $2\pi$  for this  
161 purpose) [30]. 95% confidence intervals of the median (Fig. 2e) were calculated using bootstrap  
162 resampling (bootstrap sample size: 84, number of re-samples: 10000). For all statistical tests, alpha  
163 was set at 0.05 and tests were conducted two-tailed.

## 164 **Results**

### 165 **Identifying the same neurons across microscopy techniques**

166 To compare evoked neuronal responses as obtained with a commercially available miniaturized  
167 microscope (Doric Lenses) and a custom-built two-photon microscope, we imaged V1 excitatory layer  
168 2/3 neurons expressing the genetically encoded calcium indicator GCaMP6s while the anesthetized  
169 mice ( $n = 8$ ) were presented with drifting square wave gratings (Fig. 1a) [11]. To minimize recording  
170 fluorescence from out-of-focus neurons, we used a dual viral vector intersectional approach and  
171 reduced the titer of the Cre-expressing viral vector, resulting in sparse labelling of neurons (see  
172 Methods; Fig. 1b). Post-hoc immunohistochemical analysis revealed that  $32.6 \pm 7.3$  % of excitatory  
173 layer 2/3 neurons were labelled in the core of the bolus (injection titer of  $1.15 \cdot 10^{10}$  GC ml<sup>-1</sup>; Fig. 1c).  
174 Using superficial blood vessels as landmarks, we centered the fields of view of both microscopes on the  
175 same location. To overcome the differences in optical sectioning of both microscopes, we compared  
176 a single, background-subtracted field of view recorded with the miniaturized microscope with a  
177 two-photon microscope stack, collapsed along the axial axis spanning a depth of 100  $\mu\text{m}$  (Figs. 1d, e).  
178 Upon completion of both imaging sessions, neurons were matched based on their position relative to  
179 blood vessels, other identified neurons and relative depth in the tissue (Figs. 1d, e).

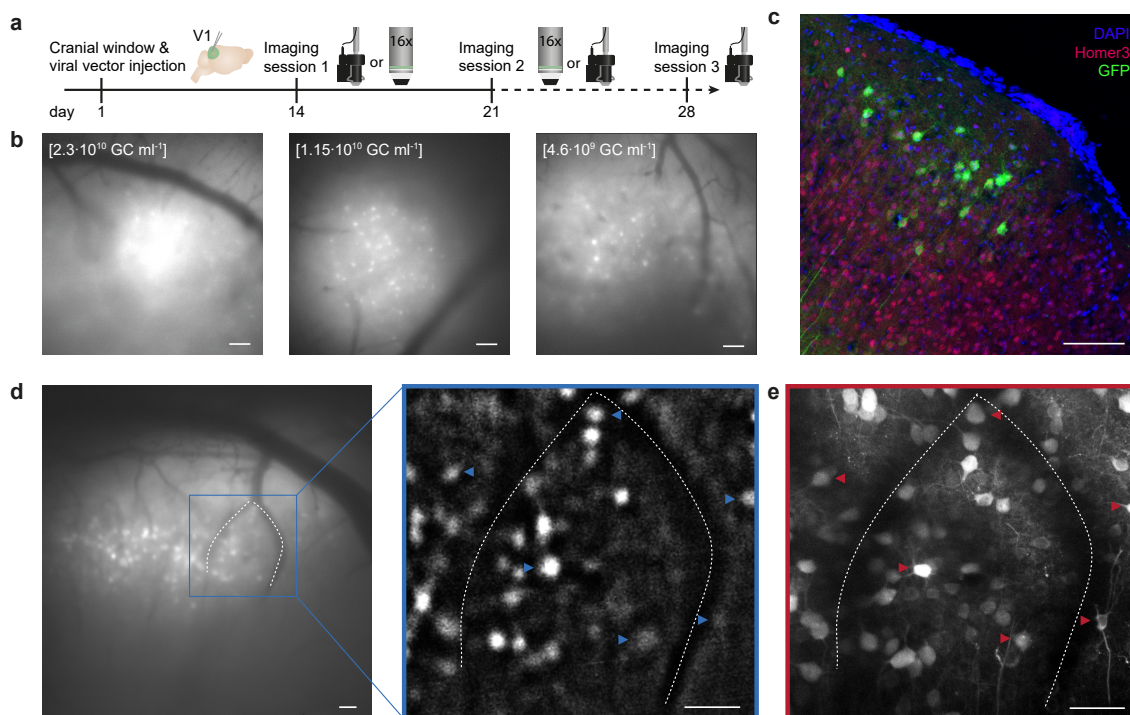

**Fig 1. Matching neurons in images acquired with a miniaturized microscope and a two-photon microscope.** (a) Experimental timeline in days. Day 1: Cranial window implant and viral vector injection into visual cortex layer 2/3. Days 14 and 21: One miniature and one two-photon microscopy imaging session on either day (order was counterbalanced across animals). Day 28: Optional second miniature microscopy session. Icons at day 14, 21 and 28 illustrate a miniature microscope and a 16× two-photon microscope objective. (b) Example miniaturized microscopy images of V1 injected with different viral vector titers (left:  $2.3 \cdot 10^{10}$  GC ml<sup>-1</sup>; middle:  $1.15 \cdot 10^{10}$  GC ml<sup>-1</sup>; right:  $4.6 \cdot 10^9$  GC ml<sup>-1</sup>). (c) Immunohistochemical labeling of GCaMP6s-expressing excitatory layer 2/3 neurons (injection titer of  $1.15 \cdot 10^{10}$  GC ml<sup>-1</sup>). (d) Left: Miniaturized microscopy image prior to processing. Right: Magnified image after background-subtraction. Blood vessels (dotted lines) assist in matching neurons between microscopes (see panel e; examples of matched neurons are indicated with arrowheads). (e) A collapsed volume as imaged with the two-photon microscope (100 planes, 1 μm spacing, projection along the axial axis). Scale bars, 100 μm (b, c) and 50 μm (d, e).

## 180 Extraction of stimulus-evoked responses of matched neurons

181 After careful, off-line matching of neurons across images, we were able to identify 488 neurons that  
 182 were present in both fields of view (Fig. 2a). This matching method allowed us to recognize a match  
 183 for many, but not all neurons in the imaged planes. Of note, we found that the population of neurons  
 184 detected in a single miniaturized microscopy imaging plane spanned over 70 μm in depth within the  
 185 two-photon imaged volume (Fig. 2b).



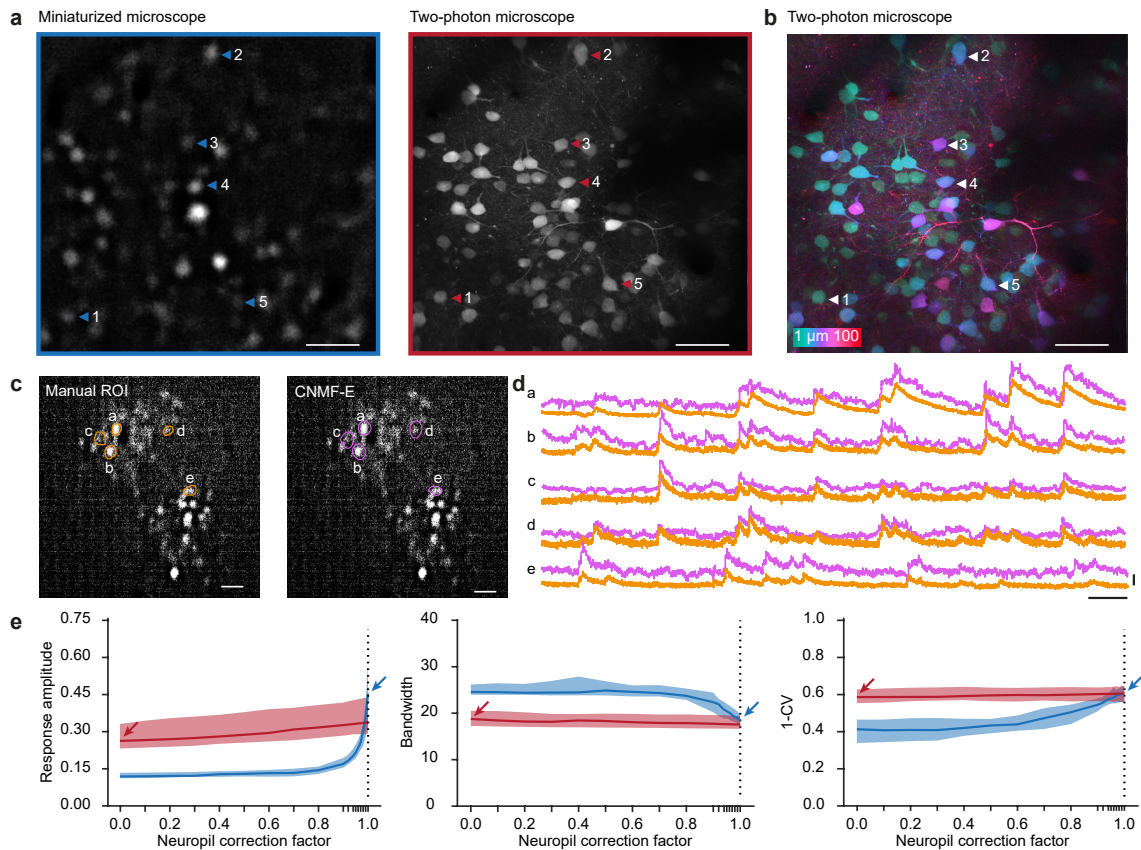

**Fig 2. Imaging of visually evoked responses using a miniaturized microscope and a two-photon microscope.** (a) A background-subtracted image acquired with a miniaturized microscope (left) and a collapsed volume (100 planes, 1  $\mu\text{m}$  spacing) acquired with a two-photon microscope (right). Example neurons matched across microscopes are indicated with arrowheads. (b) Pixel-wise color-coded depth origin of the collapsed two-photon volume. (c) Contours of neurons detected with either manual ROI selection (orange, left) or CNMF-E (pink, right) within the same background-subtracted field of view recorded with a miniaturized microscope. (d) Relative fluorescence changes ( $\Delta F/F$ ) of example neurons indicated in (c). (e) Median response amplitude ( $\Delta F/F$ ), bandwidth and global orientation selectivity index (1-CV) as a function of neuropil correction factor in recordings acquired from orientation tuned neurons using a miniaturized microscope (blue) and a two-photon microscope (red). Arrows indicate parameter values at the selected neuropil correction factor of miniature microscopy (blue) and two-photon microscopy (red). Colored shading indicates 95% confidence interval. Scale bars, 50  $\mu\text{m}$  (a, b), 100  $\mu\text{m}$  (c), 25 s (d, horizontal), 1  $\Delta F/F$  (d, vertical).

186 Before analyzing calcium activity from these neurons, we explored whether the obtained calcium  
 187 transients were robust to the choice of signal extraction method. To this end, we extracted single cell  
 188 calcium transients in a subset of miniaturized microscopy recordings by manual region of interest  
 189 (ROI) selection [13], which involves outlining of the neurons' contours and direct surrounding by the  
 190 experimenter (see Methods). We contrasted this to constrained nonnegative matrix factorization for  
 191 microendoscopic data (CNMF-E) [14, 15], which decomposes the recorded fluorescence into spatial

192 footprints and temporal components modelling the calcium dynamics (Figs. 2c,d). The obtained  
193 calcium transients were similar in both signal amplitude and transient kinetics (Fig. 2d). However,  
194 source extraction methods often return spatial footprints that extend beyond the boundaries of  
195 visually identified neurons and tend to ignore cells that show only little calcium activity. Because re-  
196 identification of neurons across microscopy techniques relied on a direct comparison of morphological  
197 information, independent of calcium activity, we chose to quantify calcium traces and tuning properties  
198 using manual ROI selection.

199 An important step in the calculation of single cell calcium traces using manual ROI selection is  
200 to correct the contamination of cellular signals by out-of-focus fluorescence from the neuropil. The  
201 method, referred to as neuropil correction [13], measures neuropil fluorescence from an area directly  
202 surrounding the cell and subtracts the neuropil-signal time course, scaled by a factor (neuropil  
203 correction factor), from the signal measured within the outline of the cell. The rationale is that the  
204 signal measured within the cellular ROI is the linear sum of two signals: one truly generated in the  
205 ROI and one originating from tissue adjacent to the ROI (due to the limited axial and/or lateral  
206 resolution as well as tissue scattering). By choosing an appropriate neuropil correction factor, the  
207 contamination can be corrected by subtraction of the scaled neuropil time course. In our experiments,  
208 labeling of cortical cells was sparse, and we observed only a very small amount of neuropil fluorescence  
209 in the two-photon microscopy recordings (Fig. 2a, right panel). Hence, we chose to use a neuropil  
210 correction factor of 0.0 for these experiments. In contrast, miniaturized epifluorescence microscopy  
211 lacks optical sectioning, therefore we assumed that in those experiments virtually all of the signal  
212 originating from above and below an outlined neuron will mix into the measured neuronal signal,  
213 resulting in an estimated neuropil correction factor of 1.0.

214 In order to test whether our choice of neuropil correction factor for each method was appropriate,  
215 we varied the neuropil correction factor from 0.0 to 1.0 and investigated how three key parameters in  
216 this study changed as a result (the parameters were response amplitude, bandwidth and the global  
217 orientation selectivity index 1-circular variance (1-CV) of orientation tuned cells; see below and  
218 Methods for further explanation). The analysis showed that, in our two-photon microscopy recordings,  
219 these parameters altogether depended very little on the choice of neuropil correction factor (Fig. 2e).  
220 This indicated that neuropil contamination was negligible, and it validated the choice for the value  
221 of 0.0 in two-photon microscopy recordings. However, in miniaturized microscopy recordings, all  
222 three parameters depended strongly on the neuropil contamination factor; signal amplitude and  
223 orientation selectivity (1-CV) increasing monotonically and bandwidth decreasing monotonically

224 (Fig. 2e). The curves for miniaturized and two-photon microscopy recordings intersected when the  
225 neuropil correction factor approximated the maximum value of 1.0, suggesting that the choice of  
226 neuropil correction factor in miniaturized microscopy recordings (1.0) is close to the optimal value.

### 227 **Orientation tuned neurons show similar tuning properties in miniaturized** 228 **microscope and two-photon microscope recordings**

229 We extracted the calcium transients of all matched neurons and quantified the responses to visual  
230 stimulation (Fig. 3a). Both the average response amplitude ( $r_s = 0.602$ ,  $p = 1.841 \cdot 10^{-49}$ ,  $n = 488$   
231 neurons; Fig. 3b) and the  $\Delta F/F$  signal-to-noise ratio ( $r_s = 0.407$ ,  $p = 6.348 \cdot 10^{-21}$ ,  $n = 488$  neurons;  
232 Fig. 3b) measured using the miniaturized microscope correlated strongly with the measurements  
233 recorded using the two-photon microscope. The median visually evoked response amplitude was  
234 significantly higher in miniaturized microscopy recordings (Mdn = 0.115) compared to two-photon  
235 microscopy recordings (Mdn = 0.0525, Wilcoxon test,  $T = 92271$ ,  $p = 1.268 \cdot 10^{-25}$ ).

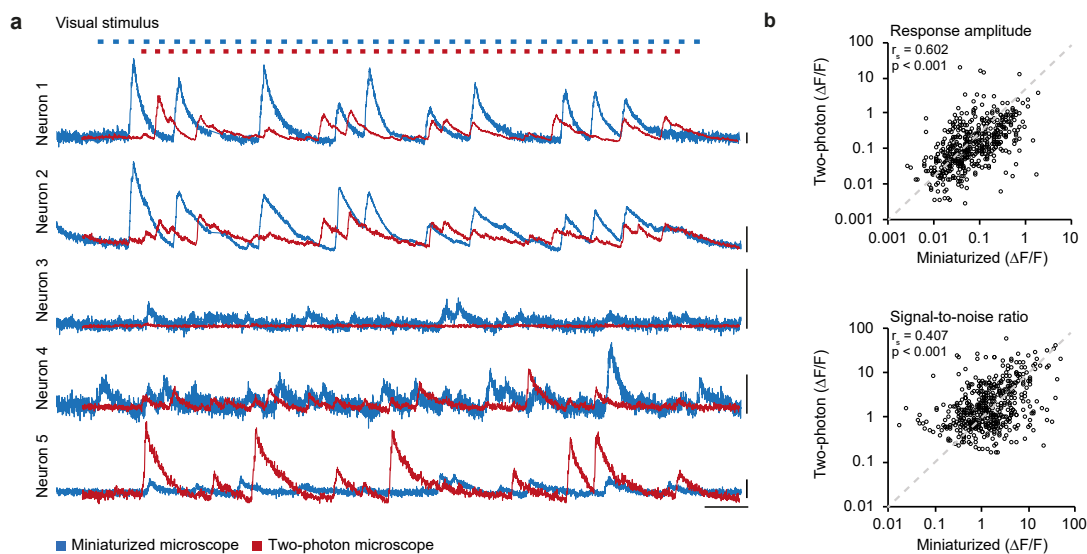

**Fig 3. Calcium traces in miniaturized microscope and two-photon microscope recordings.** (a) Relative fluorescence changes ( $\Delta F/F$ ) for the five example neurons depicted in Fig. 2a,b as recorded with a miniaturized microscope (blue) and a two-photon microscope (red) during visual stimulation. Top: Blue and red marks indicate stimulus presentation for miniaturized microscopy and two-photon microscopy, respectively. Stimuli were presented in a pseudo-randomized order that was unique for each experiment. (b) Average  $\Delta F/F$  response amplitude to the preferred stimulus ( $p = 1.841 \cdot 10^{-49}$ , Spearman's correlation) and  $\Delta F/F$  signal-to-noise ratio of stimulus-induced calcium transients ( $p = 6.348 \cdot 10^{-21}$ , Spearman's correlation) of all matched neurons (488 neurons,  $n = 8$  mice) in miniaturized microscope recordings plotted against the respective values in two-photon microscope recordings. Scale bars, 1  $\Delta F/F$  (a, vertical), and 25 s (a, horizontal).

236 In contrast, the median  $\Delta F/F$  signal-to-noise ratio was significantly higher in two-photon mi-  
 237 croscopy recordings (Mdn = 1.432) compared to miniaturized microscopy recordings (Mdn = 1.339,  
 238 Wilcoxon test,  $T = 69005$ ,  $p = 0.003$ ). Thus, while single-neuron visually driven fluorescence  
 239 changes were strongly correlated between microscopes, the absolute values of response amplitude  
 240 and signal-to-noise ratio were slightly different (this difference varies as function of the value of the  
 241 neuropil correction factor; see Discussion and Fig. 2e).

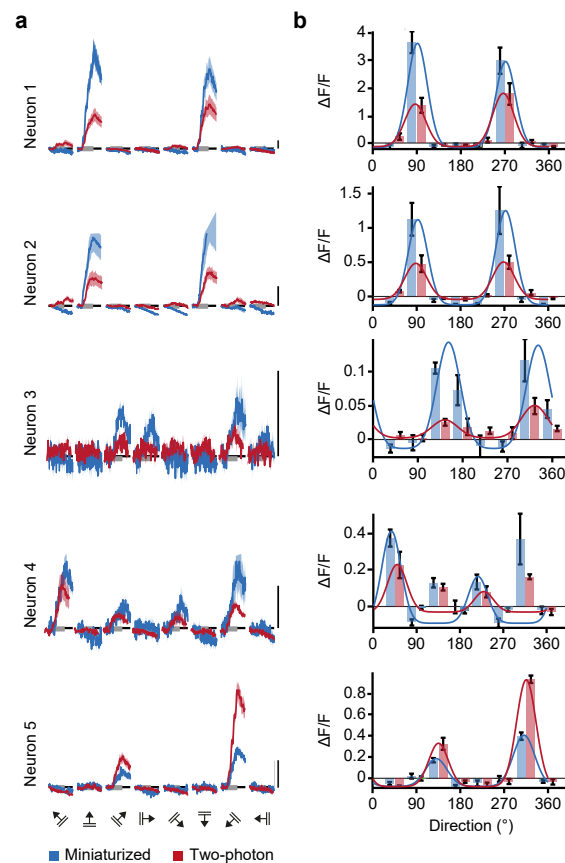

**Fig 4. Orientation tuning curves of V1 neurons match between miniaturized microscopy and two-photon microscopy.** (a) Calcium responses as acquired with a miniaturized microscope (blue) and a two-photon microscope (red) in response to drifting gratings (8 directions, 5 repetitions) of the five example neurons depicted in Fig. 2a,b. (b) Bars show the mean ( $\pm$  SEM) responses of the same neurons imaged with a miniaturized microscope (blue) and a two-photon microscope (red). Overlaid blue and red lines indicate the fitted tuning curves. Scale bars, 1  $\Delta F/F$ .

242 Many V1 neurons respond preferentially to moving gratings of specific orientations (Fig. 4a) and  
 243 their tuning features are relatively stable over the course of weeks [10,12], making this response  
 244 property ideally suited for a direct comparison of the microscopy techniques. We averaged the calcium  
 245 responses to the moving gratings of different directions and fitted the responses with a two-peaked

246 Gaussian curve (Fig. 4b). Out of 488 matched neurons, 194 were classified to be orientation tuned  
247 (see Methods) in miniaturized microscopy recordings, 133 in two-photon microscopy recordings, and  
248 84 of these matched the criteria for being orientation tuned in both miniaturized and two-photon  
249 microscopy recordings ( $n = 7$  mice; Fig. 5a).

250 Key parameters of the tuning curves (preferred orientation, bandwidth, and global orientation  
251 selectivity, as described by 1-CV) were first determined for all neurons that were orientation tuned  
252 in each microscopy technique separately (Fig. 5b). The overall distributions for preferred orientation  
253 (two-sample Kolmogorov-Smirnov test,  $D = 0.073$ ,  $p = 0.777$ ) and 1-CV (two-sample Kolmogorov-  
254 Smirnov test,  $D = 0.071$ ,  $p = 0.806$ ) did not significantly differ between microscopy techniques  
255 ( $n_{\text{miniaturized}} = 194$ ,  $n_{\text{two-photon}} = 133$  in 7 mice). However, tuning curve bandwidth was distributed  
256 differently between microscopy techniques (two-sample Kolmogorov-Smirnov test,  $D = 0.168$ ,  $p =$   
257  $0.020$ ). This observation indicates that orientation tuning in two-photon recordings appeared slightly  
258 broader, as evidenced by a larger median bandwidth ( $\text{Mdn}_{\text{miniaturized}} = 18.9$ ,  $\text{Mdn}_{\text{two-photon}} = 19.8$ ,  
259 Mann-Whitney U-test,  $U = 29919$ ,  $p = 0.024$ ), while median global orientation selectivity did not  
260 significantly differ (1-CV,  $\text{Mdn}_{\text{miniaturized}} = 0.564$ ,  $\text{Mdn}_{\text{two-photon}} = 0.561$ , Mann-Whitney U-test,  $U$   
261  $= 32239$ ,  $p = 0.61$ ). However, the existence of a difference between the distribution-median of tuning  
262 curve parameters depends on fine-tuning of the neuropil correction factor (see above, Discussion and  
263 Fig. 2e).

264 To compare the tuning properties at the single neuron level, we limited the analysis to neurons  
265 that were classified orientation tuned with both microscopy techniques ( $n = 84$  in 5 mice). Most  
266 importantly in the present context, the preferred orientation ( $r_{\text{circ}} = 0.557$ ,  $p = 2.02 \cdot 10^{-6}$ ), bandwidth  
267 ( $r_s = 0.410$ ,  $p = 1.23 \cdot 10^{-4}$ ) and the global orientation selectivity index (1-CV;  $r_s = 0.400$ ,  $p =$   
268  $1.81 \cdot 10^{-4}$ ) of these individual neurons correlated significantly between recordings performed with both  
269 microscopes ( $n = 84$  neurons; Fig. 5c). As already quantified for the overall population, the average  
270 response amplitude across these orientation tuned neurons was again significantly higher in the  
271 miniaturized microscopy recordings ( $\text{Mdn} = 0.457$ ) than in two-photon microscopy recordings ( $\text{Mdn}$   
272  $= 0.265$ , Wilcoxon test,  $T = 2913$ ,  $p = 4.89 \cdot 10^{-7}$ ,  $n = 84$  neurons). However, in this specific subset  
273 of neurons the  $\Delta F/F$  signal-to-noise ratio was significantly higher in the two-photon microscopy  
274 recordings ( $\text{Mdn} = 7.137$ ) compared to the miniaturized microscopy recordings ( $\text{Mdn} = 4.838$ ,  
275 Wilcoxon test,  $T = 1066$ ,  $p = 0.001$ ,  $n = 84$  neurons).

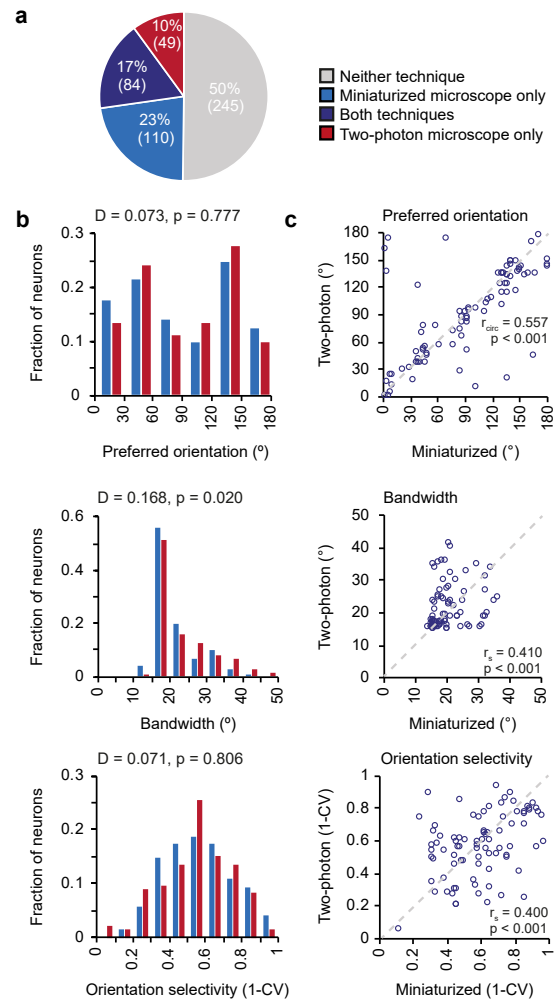

**Fig 5. Orientation tuning properties of V1 neurons as imaged with a miniaturized microscope and a two-photon microscope.** (a) Fractions of neurons that were classified as orientation tuned in miniaturized microscope recordings only (blue), using both microscopy techniques (purple), in two-photon microscope recordings only (red), or using neither microscopy technique (gray). (b) Distribution of preferred orientation ( $p = 0.777$ , two-sample Kolmogorov-Smirnov test), bandwidth ( $p = 0.020$ , two-sample Kolmogorov-Smirnov test), and global orientation selectivity index 1-CV ( $p = 0.806$ , two-sample Kolmogorov-Smirnov test) for all neurons that were orientation tuned in recordings with a miniaturized microscope (blue bars, 194 neurons,  $n = 7$  mice) or a two-photon microscope (red bars, 133 neurons,  $n = 6$  mice). (c) Preferred orientation ( $p = 2.02 \cdot 10^{-6}$ , circular correlation), bandwidth ( $p = 1.23 \cdot 10^{-4}$ , Spearman's correlation), and global orientation selectivity index 1-CV ( $p = 1.81 \cdot 10^{-4}$ , Spearman's correlation) for individual neurons (purple circles) that were orientation tuned using both microscopy techniques (84 neurons,  $n = 5$  mice). The unity line is depicted as gray dashed line.

276 **The effect of between-session variability on signal amplitude and tuning**  
277 **properties**

278 To test to which extent observed differences between microscopy techniques could be explained  
279 by test-retest variance, we performed a second miniaturized microscopy session spaced one week  
280 apart from the first miniaturized microscopy session in four mice (Fig. 1a). In order to allow a  
281 direct comparison between this analysis and the results described above, we only considered neurons  
282 that were also observed in the accompanying two-photon microscopy session. As expected, both  
283 average response amplitude ( $r_s = 0.585$ ,  $p = 4.78 \cdot 10^{-18}$ ,  $n = 181$  neurons in 4 mice; Fig. 6a) and  
284 the  $\Delta F/F$  signal-to-noise ratio ( $r_s = 0.647$ ,  $p = 6.45 \cdot 10^{-23}$ ,  $n = 181$  neurons in 4 mice; Fig. 6a) were  
285 strongly correlated between the two miniaturized microscopy sessions. When comparing the response  
286 amplitude correlation of two consecutive miniaturized microscopy sessions with the correlation  
287 between two sessions using the two different microscopes (Fig. 3b versus Fig. 6a), the correlation  
288 coefficient between these groups was not significantly different (Fisher's r-to-z transformation,  $z =$   
289  $0.3$ ,  $p = 0.382$ ).

290 Finally, we assessed tuning curve parameters of neurons that were orientation tuned in both  
291 miniaturized microscopy sessions, as well as visually detected in the two-photon microscopy session  
292 ( $n = 49$  in 3 mice). The preferred orientation ( $r_{\text{circ}} = 0.348$ ,  $p = 0.018$ ) and bandwidth ( $r_s =$   
293  $0.319$ ,  $p = 0.026$ ) of these individual neurons correlated significantly between test-retest conditions  
294 (Fig. 6b). However, the test-retest relationship between the global orientation selectivity index was  
295 not significant (1-CV;  $r_s = 0.266$ ,  $p = 0.065$ ; Fig. 6b), possibly because of the low number of neurons  
296 that could be included in this analysis.

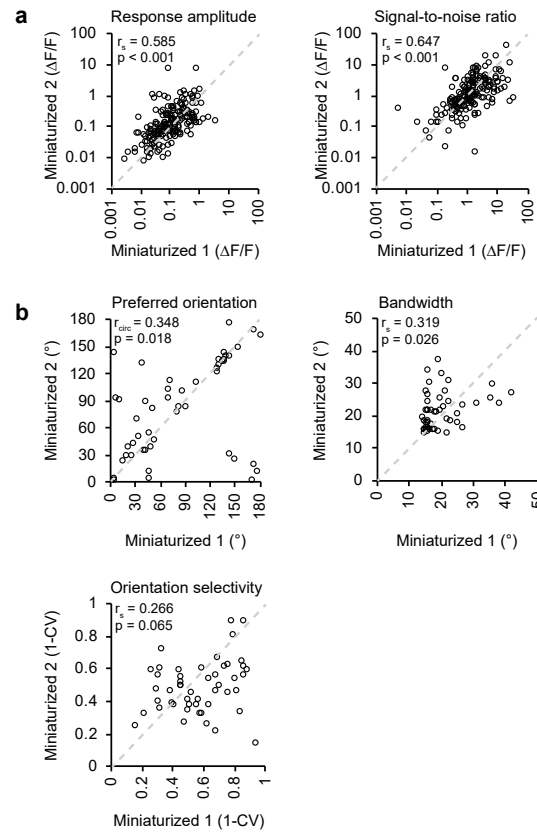

**Fig 6. Effect of test-retest variability on recorded response properties in V1.** (a) Average  $\Delta F/F$  response amplitude to the preferred stimulus ( $p = 4.780 \cdot 10^{-18}$ , Spearman's correlation) and  $\Delta F/F$  signal-to-noise ratio of stimulation-induced calcium transients ( $p = 6.451 \cdot 10^{-23}$ , Spearman's correlation) of matched neurons (181 neurons,  $n = 4$  mice) in two consecutive miniaturized microscopy sessions (Miniaturized 1 and Miniaturized 2). (b) Preferred orientation ( $p = 0.018$ , circular correlation), bandwidth ( $p = 0.026$ , Spearman's correlation), and global orientation selectivity index 1-CV ( $p = 0.065$ , Spearman's correlation) for individual neurons (black circles) that were orientation tuned during both consecutive microscopy sessions and visually detected in the two-photon microscopy session (49 neurons,  $n = 3$  mice).

## 297 Discussion

298 We used calcium imaging to measure visual response properties of V1 excitatory neurons with both  
 299 a miniaturized microscope and a stationary two-photon microscope. The same neurons could be  
 300 identified in images acquired with both microscopes. This was achieved by making use of sparse  
 301 GCaMP6 labelling and volumetric structural imaging to overcome differences in optical sectioning  
 302 between the two microscopy techniques. The amplitude and signal-to-noise ratio of visually evoked  
 303 calcium transients of identical neurons were strongly correlated across imaging techniques and  
 304 tuning features of orientation-tuned neurons recorded with the two microscopes were similar at the



305 individual cell level. However, the population median of response and tuning parameters could be  
306 offset depending on the choice of neuropil correction factor that was applied to miniature microscopy  
307 data. The observed similarities were comparable to those between two consecutive miniaturized  
308 microscopy sessions. This suggests that the observed variability between microscopes is not larger  
309 than expected from miniature microscope test-retest variability. Overall, our results show that  
310 single-photon miniaturized microscopy is a reliable method for recording functional properties of  
311 neurons in the visual cortex.

## 312 **Influence of out-of-focus fluorescence**

313 Although neuronal stimulus-induced calcium transients and orientation tuning features were strongly  
314 correlated between microscopy techniques at the single neuron level, we did observe certain differences  
315 when comparing the distributions of these features across the population of recorded neurons. The  
316 maximum amplitude of stimulus-induced calcium transients was larger in miniaturized microscope  
317 recordings, while the signal-to-noise ratio was lower. Furthermore, across the population of orientation-  
318 tuned neurons, local feature selectivity was slightly reduced as described by broader tuning curve  
319 bandwidths in recordings with the two-photon microscope.

320 Differences between the distributions of signal-to-noise ratio might be expected when comparing  
321 two imaging methods that differ vastly in the numbers of photons collected per neuron, e.g. using a  
322 CMOS sensor for miniaturized microscopy and a photomultiplier tube for two-photon microscopy.  
323 Moreover, differences in response amplitude and orientation selectivity can be attributed, at least in  
324 part, to the choice of the neuropil correction factor for analyzing miniaturized microscopy recordings.  
325 The curves describing the relationship between neuropil correction factor and  $\Delta F/F$  response  
326 amplitude calculated for two-photon and miniaturized microscopy data intersect at a neuropil  
327 correction factor slightly smaller than 1.0 (see Fig. 2e). Empirically, it can therefore be argued  
328 that for miniaturized microscopy a neuropil correction factor slightly below 1.0 should be employed,  
329 which is also theoretically evident: the neuropil signal is estimated by calculating the mean of all  
330 fluorescence in the cell-devoid region directly adjacent to an ROI (e.g. a neuron). On the other  
331 hand, the measured neuronal signal is the sum of the true neuronal signal from the cell body and  
332 the neuropil signal originating from within the ROI, not including any neuropil signal from the  
333 axial/lateral range in which the neuron's cell body was present. Thus, the intensity of neuropil signal  
334 bleeding into the neuronal signal is slightly lower than the intensity of neuropil signal measured in

335 the area adjacent to the neuronal ROI. The optimal neuropil correction factor for an imaging method  
336 with poor optical sectioning (such as miniaturized microscopy) should therefore be just below 1.0,  
337 rather than exactly 1.0.

338 However, the empirically determined neuropil correction factor will depend on the density of  
339 neurons that expresses calcium indicator, and would have to be empirically verified for each preparation  
340 and tissue using a two-photon microscope, which is not practical for most studies. Therefore, for  
341 our purpose of verifying the general applicability of single cell calcium imaging using miniature  
342 microscopy, we think it is best to use the initial estimate of 1.0 as neuropil correction factor.

### 343 **Comparison of source extraction methods**

344 A key feature of our approach is the direct matching of the same neurons between microscopy  
345 techniques. The two techniques differ considerably in their ability for optical sectioning, with an  
346 increased probability that two neurons, located at different depths, cannot be separated using manual  
347 annotation methods in miniaturized microscopy recordings. Therefore it was important to obtain a  
348 sparse population of labelled neurons, which we achieved by titrating down the Cre-expressing viral  
349 vector. To extract calcium signals from both miniaturized microscopy and two-photon microscopy  
350 data, we chose a conventional method for extracting  $\Delta F/F$  calcium activity, which uses the mean  
351 fluorescence signal from manually detected ROIs. This method facilitated a direct, morphology-based  
352 comparison of individual neurons recorded with the two imaging techniques. However, there are  
353 alternative, activity-based automated ROI detection and source extraction methods that can be  
354 used for analyzing miniaturized microscopy and endoscopy data [14,17]. These methods have the  
355 advantage of allowing to demix activity patterns of overlapping sources (cells) that are often observed  
356 in more densely labelled preparations. In a subset of miniaturized microscopy recordings, we show  
357 that the calcium transients detected by an alternative source extraction method, CNMF-E [14], are  
358 similar to those that we detected using our manual ROI approach. We therefore expect that our  
359 conclusions extend to the use of this (and similar) source extraction and deconvolution method(s)  
360 that allow for recordings with denser labelling than reported here.

### 361 **Session-to-session variability**

362 Since the response properties of visual cortex cells are quite stable over time [10,12,18], we did not  
363 anticipate large differences in these properties to emerge within days. However, a portion of the

364 variation in measured tuning properties between microscopy techniques might be ascribed to mere  
365 difference across time points, possibly relating to small fluctuations in anesthesia at the time of  
366 imaging. We conducted consecutive imaging sessions one week apart, with the first session performed  
367 two weeks after viral vector injection. We chose a one-week interval between imaging sessions to  
368 allow the animal to recover completely from anesthesia and to allow us to approximate the same  
369 anesthetic state in both experiments. Other forms of lightly dosed anesthesia, such as isoflurane, do  
370 not significantly alter V1 response properties as compared to awake animals [19]. However, we cannot  
371 exclude the possibility that fluctuations of fentanyl-based anesthesia can cause minor differences  
372 in orientation tuning between imaging sessions in our experiment. A study performed in awake  
373 experiments with minimal lag between imaging sessions might address these concerns but may at the  
374 same time suffer from other, e.g. state-dependent sources of inter-session variability [9, 20].

### 375 **Combining miniaturized and two-photon microscopy**

376 The overall aim of our study was to quantitatively compare recordings obtained with miniaturized  
377 microscopy to those obtained with a conventional *in vivo* microscopy method such as two-photon  
378 microscopy. We report a high degree of similarity between these recordings, in spite of categorical  
379 differences between the two imaging methods [5]. A promising future approach would be to make use of  
380 both microscopy methods in a single experimental design, optimally using their respective qualitative  
381 merits. Such an approach could involve imaging of a population of neurons with a miniaturized  
382 microscope while an animal engages in a freely moving task and subsequently characterizing structural  
383 changes in neurons implicated in the task with a two-photon microscope. An exciting new possibility  
384 is two-photon miniaturized microscopy [21], which allows functional imaging of single dendrites and  
385 dendritic spines in freely behaving animals. However, the currently smaller field of view reduces  
386 the number of somata that can be imaged at once, which makes identification of (sparse) task-  
387 related neurons and of large-scale population activity dynamics challenging with this method. The  
388 combination of single-photon miniaturized microscopy and two-photon microscopy thus provides a  
389 promising approach to disentangle the processes at the functional and structural level that underlie  
390 behavior in freely moving animals.

### 391 **Acknowledgments**

392 We thank Claudia Huber, Max Sperling, Volker Staiger, and Frank Voss for technical assistance.

## 393 **Author Contributions Statements**

394 A.G. collected the data; A.G. and P.M.G. analyzed the data; all authors conceived the study and  
395 wrote the manuscript.

## 396 **Funding**

397 This project was funded by the Max Planck Society and the Collaborative Research Center SFB870  
398 of the German Research Foundation (DFG) to T.B. and M.H.

## 399 **Data Availability**

400 The dataset of this study is available on  
401 [https://web.gin.g-node.org/pgoltstein/Mini1p2pcomparison\\_Glas\\_Goltstein\\_2018](https://web.gin.g-node.org/pgoltstein/Mini1p2pcomparison_Glas_Goltstein_2018).

## **References**

1. Cai DJ, Aharoni D, Shuman T, Shobe J, Biane J, Lou J, et al. A shared neural ensemble links distinct contextual memories encoded close in time. *Nature*. 2016; 534: 115-118.
2. Ghosh KK, Burns LD, Cocker ED, Nimmerjahn A, Ziv Y, Gamal A El, et al. Miniaturized integration of a fluorescence microscope. *Nat Methods*. 2011; 8: 871-878.
3. Liberti WA, Markowitz JE, Perkins LN, Liberti DC, Leman DP, Guitchounts G, et al. Unstable neurons underlie a stable learned behavior. *Nat Neurosci*. 2016; 19: 1665-1671.
4. Betley JN, Xu S, Fang Z, Cao H, Gong R, Christopher J. Neurons for hunger and thirst transmit a negative-valence teaching signal. *Nature*. 2015; 521: 180-185.
5. Yang W, Yuste R. In vivo imaging of neural activity. *Nat Methods*. 2017; 14: 349-359.
6. Ziv Y, Burns LD, Cocker ED, Hamel EO, Ghosh KK, Kitch LJ, et al. Long-term dynamics of CA1 hippocampal place codes. *Nat Neurosci*. 2013; 16: 264-266.
7. Kamigaki T, Dan Y. Delay activity of specific prefrontal interneuron subtypes modulates memory-guided behavior. *Nat Neurosci*. 2017; 20: 854-863.

8. Hubel DH, Wiesel TN. Receptive fields, binocular interaction and functional architecture in the cat's visual cortex. *J Physiol.* 1962; 160: 106-154.
9. Niell CM, Stryker MP. Highly selective receptive fields in mouse visual cortex. *J Neurosci.* 2008; 28: 7520-7536.
10. Mank M, Santos AF, Drenth S, Mrcic-Flogel TD, Hofer SB, Stein V, et al. A genetically encoded calcium indicator for chronic in vivo two-photon imaging. *Nat Methods.* 2008; 5: 805-811.
11. Chen TW, Wardill TJ, Sun Y, Pulver SR, Renninger SL, Baohan A, et al. Ultrasensitive fluorescent proteins for imaging neuronal activity. *Nature.* 2013; 499: 295-300.
12. Rose T, Jaepel J, Hübener M, Bonhoeffer T. Cell-specific restoration of stimulus preference after monocular deprivation in the visual cortex. *Science.* 2016; 352: 1319-1322.
13. Kerlin AM, Andermann ML, Berezovskii VK, Reid RC. Broadly tuned response properties of diverse inhibitory neuron subtypes in mouse visual cortex. *Neuron.* 2010; 67: 858-871.
14. Zhou P, Resendez SL, Rodriguez-Romaguera J, Jimenez JC, Neufeld SQ, Stuber GD, et al. Efficient and accurate extraction of in vivo calcium signals from microendoscopic video data. *ELife.* 2018; 7: e28728.
15. Klaus A, Martins GJ, Paixao VB, Zhou P, Paninski L, Costa RM. The spatiotemporal organization of the striatum encodes action space. *Neuron.* 2017; 95: 1171-1180.
16. Mukamel EA, Nimmerjahn A, Schnitzer MJ. Automated analysis of cellular signals from large-scale calcium imaging data. *Neuron.* 2009; 63: 747-760.
17. Lu J, Li C, Singh-Alvarado J, Zhou ZC, Fröhlich F, Mooney R, et al. MIN1PIPE: A miniscope 1-photon-based calcium imaging signal extraction pipeline. *Cell Rep.* 2018; 23: 3673-3684.
18. Poort J, Khan AG, Pachitariu M, Nemri A, Orsolich I, Krupic J, et al. Learning enhances sensory and multiple non-sensory representations in primary visual cortex. *Neuron.* 2015; 86: 1478-1490.
19. Goltstein PM, Montijn JS, Pennartz CMA. Effects of isoflurane anesthesia on ensemble patterns of  $\text{Ca}^{2+}$  activity in mouse V1: reduced direction selectivity independent of increased correlations in cellular activity. *PLoS One.* 2015; 10: e0118277

20. Polack PO, Friedman J, Golshani P. Cellular mechanisms of brain state-dependent gain modulation in visual cortex. *Nat Neurosci.* 2013; 16: 1331-1339.
21. Zong W, Wu R, Li M, Hu Y, Li Y, Li J, et al. Fast high-resolution miniature two-photon microscopy for brain imaging in freely behaving mice. *Nat Methods.* 2017; 14: 713-719
22. Schuett S, Bonhoeffer T, Hübener M. Mapping retinotopic structure in mouse visual cortex with optical imaging. *J Neurosci.* 2002; 22: 6549-6559.
23. Grinvald A, Bonhoeffer T. Optical imaging of electrical activity based on intrinsic signals and on voltage sensitive dyes. In: Toga AW, editor. *Brain mapping; the methods.* Academic Press Hardcover; 1996. pp. 55-97.
24. Leinweber M, Zmarz P, Buchmann P, Argast P, Hübener M, Bonhoeffer T, et al. . Two-photon calcium imaging in mice navigating a virtual reality environment. *J Vis Exp JoVE.* 2014; 84: e50885
25. Schindelin J, Arganda-Carreras I, Frise E, Kaynig V, Longair M, Pietzsch T, et al. Fiji: An open-source platform for biological-image analysis. *Nat Methods.* 2012; 9: 676-682.
26. Guizar-sicairos M, Thurman ST, Fienup JR. Efficient subpixel image registration algorithms. *Optics Letters.* 2008; 33: 156-158.
27. Greenberg DS, Houweling AR, Kerr JND. Population imaging of ongoing neuronal activity in the visual cortex of awake rats. *Nat Neurosci.* 2008; 11: 749-751.
28. Mazurek M, Kager M, Van Hooser SD, Margolis DJ. Robust quantification of orientation selectivity and direction selectivity. *Front Neural Circuits.* 2014; 8: 1-17.
29. Ringach DL, Shapley RM, Hawken MJ. selectivity in macaque V1: diversity and laminar dependence. *J Neurosci.* 2002; 22: 5639-5651.
30. Berens P. CircStat: a MATLAB toolbox for circular statistics. *J. Stat. Softw.* 2009; 31: 1-21.
